# Supplementary material for: Discovery of a Series of 1,2,3-Triazole-Containing Erlotinib Derivatives With Potent Anti-Tumor Activities Against Non-Small Cell Lung Cancer
Source: Front Chem. 2022 Jan 7;9:789030. doi: 10.3389/fchem.2021.789030 (PMC8776995; doi:10.3389/fchem.2021.789030)
Supplement: Supplementary file 6 [file Table4.XLS]

## Sheet: Results
Block Type	96well
Chemistry	SYBR_GREEN
Experiment File Name	E:\SG\20201020-1 SG.eds
Experiment Run End Time	2020-10-20 15:57:36 PM PDT
Instrument Type	steponeplus
Passive Reference	ROX
Well	Sample Name	Target Name	Task	Reporter	Quencher	RQ	RQ Min	RQ Max	Cт	Cт Mean	Cт SD	ΔCт	ΔCт Mean	ΔCт SE	HK Control ΔCт Mean	HK Control ΔCт SE	ΔΔCт	Automatic Ct Threshold	Ct Threshold	Automatic Baseline	Baseline Start	Baseline End	Efficiency	Comments	HIGHSD	NOISE
A1	NC	b-Actin	UNKNOWN	SYBR	None				16.6844	16.6287	0.0787006							TRUE	1.52778	TRUE	3	8	1		N	N
A2	NC	b-Actin	UNKNOWN	SYBR	None				16.5731	16.6287	0.0787006							TRUE	1.52778	TRUE	3	8	1		N	N
A3	NC	CCND1	UNKNOWN	SYBR	None	1	0.49146	2.03475	23.498	23.7296	0.32753		7.10086	0.238191			0	TRUE	1.01636	TRUE	3	16	1		N	N
A4	NC	CCND1	UNKNOWN	SYBR	None	1	0.49146	2.03475	23.9612	23.7296	0.32753		7.10086	0.238191			0	TRUE	1.01636	TRUE	3	16	1		N	N
A5	NC	CDK2	UNKNOWN	SYBR	None	1	0.775483	1.28952	26.923	26.8584	0.0913447		10.2297	0.0852574			0	TRUE	1.74418	TRUE	3	18	1		N	N
A6	NC	CDK2	UNKNOWN	SYBR	None	1	0.775483	1.28952	26.7939	26.8584	0.0913447		10.2297	0.0852574			0	TRUE	1.74418	TRUE	3	18	1		N	N
A7	NC	CDK6	UNKNOWN	SYBR	None	1	0.846885	1.1808	28.9518	28.9546	0.00407442		12.3259	0.0557243			0	TRUE	2.19039	TRUE	3	19	1		N	N
A8	NC	CDK6	UNKNOWN	SYBR	None	1	0.846885	1.1808	28.9575	28.9546	0.00407442		12.3259	0.0557243			0	TRUE	2.19039	TRUE	3	19	1		N	N
A9	NC	CCNA	UNKNOWN	SYBR	None	1	0.51132	1.95572	23.9073	24.1252	0.308178		7.49645	0.224908			0	TRUE	1.53794	TRUE	3	15	1		N	N
A10	NC	CCNA	UNKNOWN	SYBR	None	1	0.51132	1.95572	24.3431	24.1252	0.308178		7.49645	0.224908			0	TRUE	1.53794	TRUE	3	16	1		N	N
A11	NC	CCNB	UNKNOWN	SYBR	None	1	0.379396	2.63577	23.5863	23.2661	0.452785		6.63739	0.324968			0	TRUE	1.69993	TRUE	3	15	1		N	N
A12	NC	CCNB	UNKNOWN	SYBR	None	1	0.379396	2.63577	22.946	23.2661	0.452785		6.63739	0.324968			0	TRUE	1.69993	TRUE	3	14	1		N	N
B1	e4 4uM	b-Actin	UNKNOWN	SYBR	None				16.052	15.9827	0.0980336							TRUE	1.52778	TRUE	3	8	1		N	N
B2	e4 4uM	b-Actin	UNKNOWN	SYBR	None				15.9133	15.9827	0.0980336							TRUE	1.52778	TRUE	3	8	1		N	N
B3	e4 4uM	CCND1	UNKNOWN	SYBR	None	1.07568	0.873348	1.32488	22.9695	22.9783	0.0123473		6.99562	0.0698679			-0.105245	TRUE	1.01636	TRUE	3	16	1		N	N
B4	e4 4uM	CCND1	UNKNOWN	SYBR	None	1.07568	0.873348	1.32488	22.987	22.9783	0.0123473		6.99562	0.0698679			-0.105245	TRUE	1.01636	TRUE	3	15	1		N	N
B5	e4 4uM	CDK2	UNKNOWN	SYBR	None	1.2056	0.94438	1.53908	25.9862	25.9426	0.0616382		9.95994	0.0818836			-0.269756	TRUE	1.74418	TRUE	3	17	1		N	N
B6	e4 4uM	CDK2	UNKNOWN	SYBR	None	1.2056	0.94438	1.53908	25.899	25.9426	0.0616382		9.95994	0.0818836			-0.269756	TRUE	1.74418	TRUE	3	17	1		N	N
B7	e4 4uM	CDK6	UNKNOWN	SYBR	None	1.38734	1.12288	1.71409	27.8213	27.8362	0.0211463		11.8536	0.0709145			-0.472322	TRUE	2.19039	TRUE	3	18	1		N	N
B8	e4 4uM	CDK6	UNKNOWN	SYBR	None	1.38734	1.12288	1.71409	27.8512	27.8362	0.0211463		11.8536	0.0709145			-0.472322	TRUE	2.19039	TRUE	3	18	1		N	N
B9	e4 4uM	CCNA	UNKNOWN	SYBR	None	0.816462	0.653609	1.01989	23.7441	23.7717	0.0389653		7.789	0.0745952			0.292543	TRUE	1.53794	TRUE	3	15	1		N	N
B10	e4 4uM	CCNA	UNKNOWN	SYBR	None	0.816462	0.653609	1.01989	23.7992	23.7717	0.0389653		7.789	0.0745952			0.292543	TRUE	1.53794	TRUE	3	16	1		N	N
B11	e4 4uM	CCNB	UNKNOWN	SYBR	None	1.07575	0.81246	1.42437	22.451	22.5147	0.0900432		6.53204	0.0941232			-0.105349	TRUE	1.69993	TRUE	3	14	1		N	N
B12	e4 4uM	CCNB	UNKNOWN	SYBR	None	1.07575	0.81246	1.42437	22.5784	22.5147	0.0900432		6.53204	0.0941232			-0.105349	TRUE	1.69993	TRUE	3	14	1		N	N
C1	e4 8uM	b-Actin	UNKNOWN	SYBR	None				16.9417	16.8355	0.150214							TRUE	1.52778	TRUE	3	9	1		N	N
C2	e4 8uM	b-Actin	UNKNOWN	SYBR	None				16.7293	16.8355	0.150214							TRUE	1.52778	TRUE	3	9	1		N	N
C3	e4 8uM	CCND1	UNKNOWN	SYBR	None	0.771828	0.184256	3.23309	23.8416	23.8416			7.47451	0.4803			0.37365	TRUE	1.01636	TRUE	3	16	1		Y	N
C4	e4 8uM	CCND1	UNKNOWN	SYBR	None	0.771828	0.184256	3.23309	24.7784	24.31	0.662428		7.47451	0.4803			0.37365	TRUE	1.01636	TRUE	3	15	1		Y	N
C5	e4 8uM	CDK2	UNKNOWN	SYBR	None	1.55127	1.05965	2.27097	26.3607	26.4317	0.100497		9.59625	0.127797			-0.633448	TRUE	1.74418	TRUE	3	17	1		N	N
C6	e4 8uM	CDK2	UNKNOWN	SYBR	None	1.55127	1.05965	2.27097	26.5028	26.4317	0.100497		9.59625	0.127797			-0.633448	TRUE	1.74418	TRUE	3	17	1		N	N
C7	e4 8uM	CDK6	UNKNOWN	SYBR	None	1.7457	1.2706	2.39844	28.3496	28.3576	0.0112279		11.5221	0.106514			-0.803802	TRUE	2.19039	TRUE	3	19	1		N	N
C8	e4 8uM	CDK6	UNKNOWN	SYBR	None	1.7457	1.2706	2.39844	28.3655	28.3576	0.0112279		11.5221	0.106514			-0.803802	TRUE	2.19039	TRUE	3	19	1		N	N
C9	e4 8uM	CCNA	UNKNOWN	SYBR	None	0.77798	0.545382	1.10978	24.6402	24.6941	0.0762082		7.85865	0.119105			0.362195	TRUE	1.53794	TRUE	3	16	1		N	N
C10	e4 8uM	CCNA	UNKNOWN	SYBR	None	0.77798	0.545382	1.10978	24.748	24.6941	0.0762082		7.85865	0.119105			0.362195	TRUE	1.53794	TRUE	3	16	1		N	N
C11	e4 8uM	CCNB	UNKNOWN	SYBR	None	1.13675	0.820089	1.57569	23.2614	23.2879	0.0375316		6.45247	0.109483			-0.184917	TRUE	1.69993	TRUE	3	14	1		N	N
C12	e4 8uM	CCNB	UNKNOWN	SYBR	None	1.13675	0.820089	1.57569	23.3145	23.2879	0.0375316		6.45247	0.109483			-0.184917	TRUE	1.69993	TRUE	3	14	1		N	N
D1	e4 12uM	b-Actin	UNKNOWN	SYBR	None				17.576	17.5747	0.0017587							TRUE	1.52778	TRUE	3	9	1		N	N
D2	e4 12uM	b-Actin	UNKNOWN	SYBR	None				17.5735	17.5747	0.0017587							TRUE	1.52778	TRUE	3	10	1		N	N
D3	e4 12uM	CCND1	UNKNOWN	SYBR	None	0.744068	0.501919	1.10304	25.2341	25.1021	0.186678		7.52735	0.132007			0.426494	TRUE	1.01636	TRUE	3	18	1		N	N
D4	e4 12uM	CCND1	UNKNOWN	SYBR	None	0.744068	0.501919	1.10304	24.9701	25.1021	0.186678		7.52735	0.132007			0.426494	TRUE	1.01636	TRUE	3	18	1		N	N
D5	e4 12uM	CDK2	UNKNOWN	SYBR	None	1.09491	1.04107	1.15154	27.6905	27.6736	0.0238477		10.0989	0.0169087			-0.130818	TRUE	1.74418	TRUE	3	19	1		N	N
D6	e4 12uM	CDK2	UNKNOWN	SYBR	None	1.09491	1.04107	1.15154	27.6567	27.6736	0.0238477		10.0989	0.0169087			-0.130818	TRUE	1.74418	TRUE	3	19	1		N	N
D7	e4 12uM	CDK6	UNKNOWN	SYBR	None	1.34798	1.30871	1.38843	29.46	29.4698	0.0139078		11.8951	0.00991261			-0.430799	TRUE	2.19039	TRUE	3	20	1		N	N
D8	e4 12uM	CDK6	UNKNOWN	SYBR	None	1.34798	1.30871	1.38843	29.4796	29.4698	0.0139078		11.8951	0.00991261			-0.430799	TRUE	2.19039	TRUE	3	20	1		N	N
D9	e4 12uM	CCNA	UNKNOWN	SYBR	None	0.544576	0.512137	0.579071	25.9274	25.948	0.0290699		8.37325	0.0205931			0.876794	TRUE	1.53794	TRUE	3	18	1		N	N
D10	e4 12uM	CCNA	UNKNOWN	SYBR	None	0.544576	0.512137	0.579071	25.9685	25.948	0.0290699		8.37325	0.0205931			0.876794	TRUE	1.53794	TRUE	3	18	1		N	N
D11	e4 12uM	CCNB	UNKNOWN	SYBR	None	0.985887	0.820541	1.18455	24.1711	24.2326	0.0870329		6.65789	0.0615541			0.0205059	TRUE	1.69993	TRUE	3	16	1		N	N
D12	e4 12uM	CCNB	UNKNOWN	SYBR	None	0.985887	0.820541	1.18455	24.2942	24.2326	0.0870329		6.65789	0.0615541			0.0205059	TRUE	1.69993	TRUE	3	16	1		N	N
E1	e12 4uM	b-Actin	UNKNOWN	SYBR	None				16.7963	16.7871	0.0130042							TRUE	1.52778	TRUE	3	9	1		N	N
E2	e12 4uM	b-Actin	UNKNOWN	SYBR	None				16.7779	16.7871	0.0130042							TRUE	1.52778	TRUE	3	8	1		N	N
E3	e12 4uM	CCND1	UNKNOWN	SYBR	None	0.962954	0.891007	1.04071	23.9181	23.9424	0.0344498		7.15532	0.0260375			0.0544615	TRUE	1.01636	TRUE	3	16	1		N	N
E4	e12 4uM	CCND1	UNKNOWN	SYBR	None	0.962954	0.891007	1.04071	23.9668	23.9424	0.0344498		7.15532	0.0260375			0.0544615	TRUE	1.01636	TRUE	3	16	1		N	N
E5	e12 4uM	CDK2	UNKNOWN	SYBR	None	1.00158	0.872476	1.1498	27.0599	27.0145	0.0641347		10.2274	0.0462729			-0.0022831	TRUE	1.74418	TRUE	3	18	1		N	N
E6	e12 4uM	CDK2	UNKNOWN	SYBR	None	1.00158	0.872476	1.1498	26.9692	27.0145	0.0641347		10.2274	0.0462729			-0.0022831	TRUE	1.74418	TRUE	3	18	1		N	N
E7	e12 4uM	CDK6	UNKNOWN	SYBR	None	0.860402	0.604498	1.22464	29.4479	29.3299	0.166884		12.5428	0.118363			0.216918	TRUE	2.19039	TRUE	3	20	1		N	N
E8	e12 4uM	CDK6	UNKNOWN	SYBR	None	0.860402	0.604498	1.22464	29.2119	29.3299	0.166884		12.5428	0.118363			0.216918	TRUE	2.19039	TRUE	3	20	1		N	N
E9	e12 4uM	CCNA	UNKNOWN	SYBR	None	0.64469	0.590545	0.703799	24.8889	24.9169	0.0395128		8.12978	0.029414			0.633324	TRUE	1.53794	TRUE	3	17	1		N	N
E10	e12 4uM	CCNA	UNKNOWN	SYBR	None	0.64469	0.590545	0.703799	24.9448	24.9169	0.0395128		8.12978	0.029414			0.633324	TRUE	1.53794	TRUE	3	17	1		N	N
E11	e12 4uM	CCNB	UNKNOWN	SYBR	None	1.09013	1.01202	1.17427	23.2768	23.3	0.0327693		6.51289	0.0249293			-0.124502	TRUE	1.69993	TRUE	3	15	1		N	N
E12	e12 4uM	CCNB	UNKNOWN	SYBR	None	1.09013	1.01202	1.17427	23.3232	23.3	0.0327693		6.51289	0.0249293			-0.124502	TRUE	1.69993	TRUE	3	15	1		N	N
F1	e12 8uM	b-Actin	UNKNOWN	SYBR	None				17.847	17.7761	0.100215							TRUE	1.52778	TRUE	3	10	1		N	N
F2	e12 8uM	b-Actin	UNKNOWN	SYBR	None				17.7053	17.7761	0.100215							TRUE	1.52778	TRUE	3	10	1		N	N
F3	e12 8uM	CCND1	UNKNOWN	SYBR	None	0.952787	0.757097	1.19906	24.9164	24.9468	0.0429129		7.17063	0.0770863			0.0697737	TRUE	1.01636	TRUE	3	17	1		N	N
F4	e12 8uM	CCND1	UNKNOWN	SYBR	None	0.952787	0.757097	1.19906	24.9771	24.9468	0.0429129		7.17063	0.0770863			0.0697737	TRUE	1.01636	TRUE	3	17	1		N	N
F5	e12 8uM	CDK2	UNKNOWN	SYBR	None	1.03428	0.83596	1.27964	27.9486	27.9572	0.012114		10.1811	0.0713786			-0.048624	TRUE	1.74418	TRUE	3	19	1		N	N
F6	e12 8uM	CDK2	UNKNOWN	SYBR	None	1.03428	0.83596	1.27964	27.9658	27.9572	0.012114		10.1811	0.0713786			-0.048624	TRUE	1.74418	TRUE	3	19	1		N	Y
F7	e12 8uM	CDK6	UNKNOWN	SYBR	None	1.1509	0.916077	1.44592	29.8704	29.8993	0.0408211		12.1231	0.0765161			-0.202763	TRUE	2.19039	TRUE	3	20	1		N	N
F8	e12 8uM	CDK6	UNKNOWN	SYBR	None	1.1509	0.916077	1.44592	29.9281	29.8993	0.0408211		12.1231	0.0765161			-0.202763	TRUE	2.19039	TRUE	3	20	1		N	N
F9	e12 8uM	CCNA	UNKNOWN	SYBR	None	0.527232	0.404067	0.68794	26.1419	26.1961	0.0766425		8.41994	0.0892108			0.92349	TRUE	1.53794	TRUE	3	18	1		N	N
F10	e12 8uM	CCNA	UNKNOWN	SYBR	None	0.527232	0.404067	0.68794	26.2503	26.1961	0.0766425		8.41994	0.0892108			0.92349	TRUE	1.53794	TRUE	3	18	1		N	N
F11	e12 8uM	CCNB	UNKNOWN	SYBR	None	1.02923	0.75396	1.40501	24.2953	24.3719	0.10834		6.59582	0.104356			-0.0415697	TRUE	1.69993	TRUE	3	15	1		N	N
F12	e12 8uM	CCNB	UNKNOWN	SYBR	None	1.02923	0.75396	1.40501	24.4485	24.3719	0.10834		6.59582	0.104356			-0.0415697	TRUE	1.69993	TRUE	3	16	1		N	N
G1	e12 12uM	b-Actin	UNKNOWN	SYBR	None				18.0222	17.9896	0.046023							TRUE	1.52778	TRUE	3	10	1		N	N
G2	e12 12uM	b-Actin	UNKNOWN	SYBR	None				17.9571	17.9896	0.046023							TRUE	1.52778	TRUE	3	10	1		N	N
G3	e12 12uM	CCND1	UNKNOWN	SYBR	None	0.954484	0.826938	1.1017	25.1931	25.1577	0.0500839		7.16807	0.0480964			0.0672064	TRUE	1.01636	TRUE	3	17	1		N	N
G4	e12 12uM	CCND1	UNKNOWN	SYBR	None	0.954484	0.826938	1.1017	25.1223	25.1577	0.0500839		7.16807	0.0480964			0.0672064	TRUE	1.01636	TRUE	3	17	1		N	N
G5	e12 12uM	CDK2	UNKNOWN	SYBR	None	1.0315	0.768079	1.38527	28.2679	28.1746	0.132038		10.1849	0.0988738			-0.0447454	TRUE	1.74418	TRUE	3	20	1		N	N
G6	e12 12uM	CDK2	UNKNOWN	SYBR	None	1.0315	0.768079	1.38527	28.0812	28.1746	0.132038		10.1849	0.0988738			-0.0447454	TRUE	1.74418	TRUE	3	19	1		N	N
G7	e12 12uM	CDK6	UNKNOWN	SYBR	None	1.27036	1.15124	1.40181	29.9647	29.9703	0.00786426		11.9807	0.0330149			-0.345239	TRUE	2.19039	TRUE	3	20	1		N	N
G8	e12 12uM	CDK6	UNKNOWN	SYBR	None	1.27036	1.15124	1.40181	29.9758	29.9703	0.00786426		11.9807	0.0330149			-0.345239	TRUE	2.19039	TRUE	3	21	1		N	N
G9	e12 12uM	CCNA	UNKNOWN	SYBR	None	0.54719	0.455722	0.657017	26.304	26.356	0.0735189		8.36634	0.0613317			0.869886	TRUE	1.53794	TRUE	3	18	1		N	N
G10	e12 12uM	CCNA	UNKNOWN	SYBR	None	0.54719	0.455722	0.657017	26.4079	26.356	0.0735189		8.36634	0.0613317			0.869886	TRUE	1.53794	TRUE	3	18	1		N	N
G11	e12 12uM	CCNB	UNKNOWN	SYBR	None	0.964002	0.75303	1.23408	24.6038	24.6799	0.107698		6.69028	0.0828158			0.0528927	TRUE	1.69993	TRUE	3	16	1		N	N
G12	e12 12uM	CCNB	UNKNOWN	SYBR	None	0.964002	0.75303	1.23408	24.7561	24.6799	0.107698		6.69028	0.0828158			0.0528927	TRUE	1.69993	TRUE	3	16	1		N	N
Analysis Type	Singleplex
Endogenous Control	b-Actin
RQ Min/Max Confidence Level	95.0
Reference Sample	NC
					Normalized to WT							20201020-1
		Cт	Cт Mean	Cт SD	ΔCт	ΔΔCт	2^ΔΔCт						2^ΔΔCт
NC	beta-Actin	16.6844	16.6287	0.0787006							CCND1	NC	1
	beta-Actin	16.5731	16.6287	0.0787006								e4 4uM	1.07568
	CCND1	23.498	23.7296	0.32753	7.10086							e4 8uM	1.06789
	CCND1	23.9612	23.7296	0.32753								e4 12uM	0.744067
	CDK2	26.923	26.8584	0.0913447	10.2297							e12 4uM	0.962954
	CDK2	26.7939	26.8584	0.0913447								e12 8uM	0.952787
	CDK6	28.9518	28.9546	0.00407442	12.3259							e12 12uM	0.954484
	CDK6	28.9575	28.9546	0.00407442							CDK2	NC	1
	CCNA	23.9073	24.1252	0.308178	7.49645							e4 4uM	1.2056
	CCNA	24.3431	24.1252	0.308178								e4 8uM	1.55127
	CCNB	22.946	22.946	0	6.31722							e4 12uM	1.09491
	CCNB											e12 4uM	1.00158
e4 4uM	beta-Actin	16.052	15.9827	0.0980336								e12 8uM	1.03428
e4 4uM	beta-Actin	15.9133	15.9827	0.0980336								e12 12uM	1.0315
e4 4uM	CCND1	22.9695	22.9783	0.0123473	6.99562	-0.105246	1.07568				CDK6	NC	1
e4 4uM	CCND1	22.987	22.9783	0.0123473								e4 4uM	1.38734
e4 4uM	CDK2	25.9862	25.9426	0.0616382	9.95994	-0.269754	1.2056					e4 8uM	1.74569
e4 4uM	CDK2	25.899	25.9426	0.0616382								e4 12uM	1.34798
e4 4uM	CDK6	27.8213	27.8362	0.0211463	11.8536	-0.472319	1.38734					e12 4uM	0.8604
e4 4uM	CDK6	27.8512	27.8362	0.0211463								e12 8uM	1.1509
e4 4uM	CCNA	23.7441	23.7717	0.0389653	7.789	0.292543	0.816461					e12 12uM	1.27036
e4 4uM	CCNA	23.7992	23.7717	0.0389653							CCNA	NC	1
e4 4uM	CCNB	22.451	22.5147	0.0900432	6.53204	0.214819	0.861654					e4 4uM	0.816461
e4 4uM	CCNB	22.5784	22.5147	0.0900432								e4 8uM	0.777978
e4 8uM	beta-Actin	16.9417	16.8355	0.150214								e4 12uM	0.544576
e4 8uM	beta-Actin	16.7293	16.8355	0.150214								e12 4uM	0.644689
e4 8uM	CCND1	23.8416	23.8416	0	7.0061	-0.0947571	1.06789					e12 8uM	0.527231
e4 8uM	CCND1											e12 12uM	0.547189
e4 8uM	CDK2	26.3607	26.4317	0.100497	9.59625	-0.633446	1.55127				CCNB	NC	1
e4 8uM	CDK2	26.5028	26.4317	0.100497								e4 4uM	0.861654
e4 8uM	CDK6	28.3496	28.3576	0.0112279	11.5221	-0.803799	1.74569					e4 8uM	0.910511
e4 8uM	CDK6	28.3655	28.3576	0.0112279								e4 12uM	0.789672
e4 8uM	CCNA	24.6402	24.6941	0.0762082	7.85865	0.362198	0.777978					e12 4uM	0.87317
e4 8uM	CCNA	24.748	24.6941	0.0762082								e12 8uM	0.824391
e4 8uM	CCNB	23.2614	23.2879	0.0375316	6.45247	0.135252	0.910511					e12 12uM	0.772142
e4 8uM	CCNB	23.3145	23.2879	0.0375316
e4 12uM	beta-Actin	17.576	17.5747	0.0017587
e4 12uM	beta-Actin	17.5735	17.5747	0.0017587
e4 12uM	CCND1	25.2341	25.1021	0.186678	7.52736	0.426495	0.744067
e4 12uM	CCND1	24.9701	25.1021	0.186678
e4 12uM	CDK2	27.6905	27.6736	0.0238477	10.0989	-0.130817	1.09491
e4 12uM	CDK2	27.6567	27.6736	0.0238477
e4 12uM	CDK6	29.46	29.4698	0.0139078	11.8951	-0.430798	1.34798
e4 12uM	CDK6	29.4796	29.4698	0.0139078
e4 12uM	CCNA	25.9274	25.948	0.0290699	8.37325	0.876795	0.544576
e4 12uM	CCNA	25.9685	25.948	0.0290699
e4 12uM	CCNB	24.1711	24.2326	0.0870329	6.65789	0.340675	0.789672
e4 12uM	CCNB	24.2942	24.2326	0.0870329
e12 4uM	beta-Actin	16.7963	16.7871	0.0130042
e12 4uM	beta-Actin	16.7779	16.7871	0.0130042
e12 4uM	CCND1	23.9181	23.9424	0.0344498	7.15532	0.0544605	0.962954
e12 4uM	CCND1	23.9668	23.9424	0.0344498
e12 4uM	CDK2	27.0599	27.0145	0.0641347	10.2274	-0.0022831	1.00158
e12 4uM	CDK2	26.9692	27.0145	0.0641347
e12 4uM	CDK6	29.4479	29.3299	0.166884	12.5428	0.216921	0.8604
e12 4uM	CDK6	29.2119	29.3299	0.166884
e12 4uM	CCNA	24.8889	24.9169	0.0395128	8.12978	0.633326	0.644689
e12 4uM	CCNA	24.9448	24.9169	0.0395128
e12 4uM	CCNB	23.2768	23.3	0.0327693	6.51288	0.195665	0.87317
e12 4uM	CCNB	23.3232	23.3	0.0327693
e12 8uM	beta-Actin	17.847	17.7761	0.100215
e12 8uM	beta-Actin	17.7053	17.7761	0.100215
e12 8uM	CCND1	24.9164	24.9468	0.0429129	7.17064	0.0697746	0.952787
e12 8uM	CCND1	24.9771	24.9468	0.0429129
e12 8uM	CDK2	27.9486	27.9572	0.012114	10.1811	-0.0486221	1.03428
e12 8uM	CDK2	27.9658	27.9572	0.012114
e12 8uM	CDK6	29.8704	29.8993	0.0408211	12.1231	-0.202759	1.1509
e12 8uM	CDK6	29.9281	29.8993	0.0408211
e12 8uM	CCNA	26.1419	26.1961	0.0766425	8.41994	0.923492	0.527231
e12 8uM	CCNA	26.2503	26.1961	0.0766425
e12 8uM	CCNB	24.2953	24.3719	0.10834	6.59582	0.278599	0.824391
e12 8uM	CCNB	24.4485	24.3719	0.10834
e12 12uM	beta-Actin	18.0222	17.9896	0.046023
e12 12uM	beta-Actin	17.9571	17.9896	0.046023
e12 12uM	CCND1	25.1931	25.1577	0.0500839	7.16807	0.0672073	0.954484
e12 12uM	CCND1	25.1223	25.1577	0.0500839
e12 12uM	CDK2	28.2679	28.1746	0.132038	10.1849	-0.0447445	1.0315
e12 12uM	CDK2	28.0812	28.1746	0.132038
e12 12uM	CDK6	29.9647	29.9703	0.00786426	11.9807	-0.345238	1.27036
e12 12uM	CDK6	29.9758	29.9703	0.00786426
e12 12uM	CCNA	26.304	26.356	0.0735189	8.36634	0.869888	0.547189
e12 12uM	CCNA	26.4079	26.356	0.0735189
e12 12uM	CCNB	24.6038	24.6799	0.107698	6.69028	0.373062	0.772142
e12 12uM	CCNB	24.7561	24.6799	0.107698
